# Supplementary material for: SNP Identification from RNA Sequencing and Linkage Map Construction of Rubber Tree for Anchoring the Draft Genome
Source: PLoS One. 2015 Apr 1;10(4):e0121961. doi: 10.1371/journal.pone.0121961 (PMC4382108; doi:10.1371/journal.pone.0121961)
Supplement: S11 Table — (XLS) [file pone.0121961.s017.xls]

## Sheet: Sheet1
S11 Table. Microsatellite primer blast result.
Blast match for Forward and Reverse primer and the product size in bp based on the blast match result if the primers blasted to the same contig.
Marker	Forward Primer	Forward Primer Match	Forward Primer Identity	Forward Primer Align Length	Forward Primer Query Start	Forward Primer Query End	Forward Primer Match Start	Forward Primer Match End	Forward PrimerLength	Reverse Primer	Reverse Primer Match	Reverse Primer Identity	Reverse Primer Align Length	Reverse Primer Query Start	Reverse Primer Query End	Reverse Primer Match Start	Reverse Primer Match End	Reverse PrimerLength.	ProdSize (bp)
a104	a104_F	gi|448025189|gb|AJJZ010254457.1|	100	18	1	18	1241	1258	18	a104_R	gi|448025189|gb|AJJZ010254457.1|	100	18	1	18	1415	1398	18	175
a120	a120_F	gi|448030495|gb|AJJZ010249152.1|	100	22	1	22	1886	1907	22	a120_R	gi|448030495|gb|AJJZ010249152.1|	100	23	1	23	2016	1994	23	131
a144	a144_F	gi|445384410|gb|AJJZ010977717.1|	100	23	1	23	7168	7190	23	a144_R	gi|445384410|gb|AJJZ010977717.1|	100	20	1	20	7319	7300	20	152
a200	a200_F	gi|445424057|gb|AJJZ010947777.1|	100	21	1	21	3032	3012	21	a200_R	gi|445424057|gb|AJJZ010947777.1|	100	22	1	22	2825	2846	22	208
a220	a220_F	gi|448160926|gb|AJJZ010141089.1|	100	23	2	24	4840	4818	24	a220_R	gi|448160926|gb|AJJZ010141089.1|	100	21	1	21	4675	4695	21	166
A2320	A2320_F	gi|445117817|gb|AJJZ011177688.1|	100	17	1	17	2800	2816	17	A2320_R	gi|445117817|gb|AJJZ011177688.1|	94.44	18	1	18	3094	3077	18	295
A2355	A2355_F	gi|445282065|gb|AJJZ011062457.1|	100	16	1	16	215	200	16	A2355_R	gi|445282065|gb|AJJZ011062457.1|	100	18	1	18	39	56	18	177
A2355	A2355_F	gi|447753382|gb|AJJZ010518802.1|	100	16	1	16	616	601	16	A2355_R	gi|447753382|gb|AJJZ010518802.1|	100	18	1	18	439	456	18	178
A2368	A2368_F	gi|447545744|gb|AJJZ010695626.1|	100	20	1	20	34	53	20	A2368_R	gi|447545744|gb|AJJZ010695626.1|	100	20	1	20	349	330	20	316
a238	a238_F	gi|448114209|gb|AJJZ010182245.1|	100	22	1	22	409	430	22	a238_R	gi|448114209|gb|AJJZ010182245.1|	95.83	24	1	24	592	569	24	184
A2391	A2391_F	gi|445279141|gb|AJJZ011065290.1|	100	19	1	19	517	535	19	A2391_R	gi|445279141|gb|AJJZ011065290.1|	100	18	1	18	773	756	18	257
A2404	A2404_F	gi|447868681|gb|AJJZ010403527.1|	100	17	1	17	1524	1508	17	A2404_R	gi|447868681|gb|AJJZ010403527.1|	100	21	1	21	1204	1224	21	321
A2405	A2405_F	gi|447934358|gb|AJJZ010345288.1|	100	19	1	19	2718	2736	19	A2405_R	gi|447934358|gb|AJJZ010345288.1|	100	18	1	18	2870	2853	18	153
A2413	A2413_F	gi|445450422|gb|AJJZ010929300.1|	100	18	1	18	4347	4330	18	A2413_R	gi|445450422|gb|AJJZ010929300.1|	100	17	1	17	4048	4064	17	300
A2418	A2418_F	gi|445391107|gb|AJJZ010971905.1|	100	16	1	16	4158	4143	16	A2418_R	gi|445391107|gb|AJJZ010971905.1|	100	18	1	18	4039	4056	18	120
A2419	A2419_F	gi|447731755|gb|AJJZ010540429.1|	100	16	4	19	4191	4206	19	A2419_R	gi|447731755|gb|AJJZ010540429.1|	95	20	1	20	4500	4481	20	310
A2420	A2420_F	gi|448206154|gb|AJJZ010095861.1|	100	20	1	20	2244	2263	20	A2420_R	gi|448206154|gb|AJJZ010095861.1|	100	18	1	18	2435	2418	18	192
A2423	A2423_F	gi|448049984|gb|AJJZ010229665.1|	100	17	1	17	2098	2114	17	A2423_R	gi|448049984|gb|AJJZ010229665.1|	100	18	1	18	2368	2351	18	271
A2439	A2439_F	gi|448045939|gb|AJJZ010233708.1|	100	16	1	16	4246	4231	16	A2439_R	gi|448045939|gb|AJJZ010233708.1|	100	17	1	17	3932	3948	17	315
A2442	A2442_F	gi|447864098|gb|AJJZ010408110.1|	100	19	1	19	98	116	19	A2442_R	gi|447864098|gb|AJJZ010408110.1|	100	18	1	18	246	229	18	149
A2483	A2483_F	gi|445388955|gb|AJJZ010973809.1|	100	17	1	17	5391	5375	17	A2483_R	gi|445388955|gb|AJJZ010973809.1|	100	21	1	21	5201	5221	21	191
A2489	A2489_F	gi|445435301|gb|AJJZ010940077.1|	100	15	1	15	1376	1362	15	A2489_R	gi|445435301|gb|AJJZ010940077.1|	100	19	1	19	1257	1275	19	120
A2497	A2497_F	gi|447747885|gb|AJJZ010524299.1|	100	17	1	17	3410	3394	17	A2497_R	gi|447747885|gb|AJJZ010524299.1|	100	15	1	15	3142	3156	15	269
A2500	A2500_F	gi|448000625|gb|AJJZ010279021.1|	100	18	1	18	713	696	18	A2500_R	gi|448000625|gb|AJJZ010279021.1|	100	17	1	17	621	637	17	93
A2505	A2505_F	gi|445447997|gb|AJJZ010931052.1|	100	15	2	16	6661	6647	16	A2505_R	gi|445447997|gb|AJJZ010931052.1|	100	18	1	18	6514	6531	18	148
A2507	A2507_F	gi|447688735|gb|AJJZ010580030.1|	100	18	1	18	1236	1253	18	A2507_R	gi|447688735|gb|AJJZ010580030.1|	100	18	1	18	1524	1507	18	289
A2510	A2510_F	gi|445365969|gb|AJJZ010993757.1|	100	20	1	20	1035	1016	20	A2510_R	gi|445365969|gb|AJJZ010993757.1|	100	15	1	15	827	841	15	209
A2528	A2528_F	gi|447644807|gb|AJJZ010597472.1|	100	18	1	18	999	1016	18	A2528_R	gi|447644807|gb|AJJZ010597472.1|	100	17	1	17	1309	1293	17	311
A2536	A2536_F	gi|448220120|gb|AJJZ010081895.1|	100	18	1	18	1193	1210	18	A2536_R	gi|448220120|gb|AJJZ010081895.1|	94.44	18	1	18	1344	1327	18	152
A2680	A2680_F	gi|447998365|gb|AJJZ010281281.1|	100	16	1	16	8489	8504	16	A2680_R	gi|447998365|gb|AJJZ010281281.1|	100	18	1	18	8702	8685	18	214
A2683	A2683_F	gi|445404998|gb|AJJZ010960912.1|	100	16	1	16	4618	4633	16	A2683_R	gi|445404998|gb|AJJZ010960912.1|	100	16	1	16	4798	4783	16	181
A2695	A2695_F	gi|448234168|gb|AJJZ010067848.1|	100	18	1	18	3062	3045	18	A2695_R	gi|448234168|gb|AJJZ010067848.1|	100	15	1	15	2767	2781	15	296
A2702	A2702_F	gi|447852120|gb|AJJZ010420088.1|	100	17	1	17	4842	4858	17	A2702_R	gi|447852120|gb|AJJZ010420088.1|	100	19	1	19	5069	5051	19	228
A2705	A2705_F	gi|445442057|gb|AJJZ010935366.1|	100	16	2	17	2742	2727	17	A2705_R	gi|445442057|gb|AJJZ010935366.1|	100	18	1	18	2460	2477	18	283
A2732	A2732_F	gi|447984287|gb|AJJZ010295359.1|	100	17	1	17	5854	5870	17	A2732_R	gi|447984287|gb|AJJZ010295359.1|	100	17	1	17	6168	6152	17	315
A2734	A2734_F	gi|445172726|gb|AJJZ011140924.1|	100	18	4	21	334	351	21	A2734_R	gi|445172726|gb|AJJZ011140924.1|	100	20	1	20	442	423	20	109
A2737	A2737_F	gi|448057675|gb|AJJZ010221974.1|	100	18	1	18	8185	8168	18	A2737_R	gi|448057675|gb|AJJZ010221974.1|	100	18	1	18	7921	7938	18	265
A2744	A2744_F	gi|448056107|gb|AJJZ010223542.1|	100	20	1	20	6951	6932	20	A2744_R	gi|448056107|gb|AJJZ010223542.1|	100	18	1	18	6655	6672	18	297
A2746	A2746_F	gi|447747885|gb|AJJZ010524299.1|	100	17	1	17	3410	3394	17	A2746_R	gi|447747885|gb|AJJZ010524299.1|	100	16	1	16	3226	3241	16	185
a275	a275_F	gi|447627658|gb|AJJZ010614621.1|	100	22	1	22	2409	2430	22	a275_R	gi|447627658|gb|AJJZ010614621.1|	100	23	1	23	2577	2555	23	169
A2757	A2757_F	gi|445442338|gb|AJJZ010935145.1|	100	17	1	17	6131	6115	17	A2757_R	gi|445442338|gb|AJJZ010935145.1|	100	17	1	17	5835	5851	17	297
A2758	A2758_F	gi|448059703|gb|AJJZ010219946.1|	100	16	1	16	9805	9790	16	A2758_R	gi|448059703|gb|AJJZ010219946.1|	100	17	1	17	9595	9611	17	211
A2762	A2762_F	gi|448136234|gb|AJJZ010165781.1|	100	18	1	18	3360	3377	18	A2762_R	gi|448136234|gb|AJJZ010165781.1|	100	18	1	18	3483	3466	18	124
A2763	A2763_F	gi|445426298|gb|AJJZ010946265.1|	100	18	1	18	924	907	18	A2763_R	gi|445426298|gb|AJJZ010946265.1|	100	16	1	16	680	695	16	245
a299	a299_F	gi|445384211|gb|AJJZ010977883.1|	91.3	23	1	23	909	931	23	a299_R	gi|445384211|gb|AJJZ010977883.1|	95.24	21	1	21	1006	986	21	98
A324	A324_F	gi|448117274|gb|AJJZ010180577.1|	100	22	1	22	4450	4429	22	A324_R	gi|448117274|gb|AJJZ010180577.1|	100	22	1	22	4280	4301	22	171
a385	a385_F	gi|445395482|gb|AJJZ010968293.1|	100	16	5	20	1	16	20	a385_R	gi|445395482|gb|AJJZ010968293.1|	100	23	1	23	97	75	23	97
a491	a491_F	gi|445443687|gb|AJJZ010934147.1|	100	19	1	19	5875	5857	19	a491_R	gi|445443687|gb|AJJZ010934147.1|	100	24	1	24	5725	5748	24	151
a87	a87_F	gi|447904462|gb|AJJZ010367746.1|	100	23	1	23	254	276	23	a87_R	gi|447904462|gb|AJJZ010367746.1|	100	22	1	22	413	392	22	160
a87	a87_F	gi|448011320|gb|AJJZ010268326.1|	100	21	3	23	1569	1589	23	a87_R	gi|448011320|gb|AJJZ010268326.1|	100	20	2	21	1719	1700	22	151
a90	a90_F	gi|447931575|gb|AJJZ010348071.1|	95.65	23	1	23	2491	2469	23	a90_R	gi|447931575|gb|AJJZ010348071.1|	100	20	1	20	2264	2283	20	228
mHbCIRa134	mHbCIRa134_F	gi|447954055|gb|AJJZ010325591.1|	100	24	1	24	1663	1640	24	mHbCIRa134_R	gi|447954055|gb|AJJZ010325591.1|	100	22	1	22	1499	1520	22	165
mHbCIRA2425	mHbCIRA2425_F	gi|445341792|gb|AJJZ011009194.1|	100	14	1	14	525	538	15	mHbCIRA2425_R	gi|445341792|gb|AJJZ011009194.1|	100	19	1	19	801	783	20	277
mHbCIRBAC12N03	mHbCIRBAC12N03_F	gi|445276254|gb|AJJZ011068040.1|	100	18	1	18	579	562	18	mHbCIRBAC12N03_R	gi|445276254|gb|AJJZ011068040.1|	100	20	1	20	331	350	20	249
mHbCIRBAC83E19	mHbCIRBAC83E19_F	gi|447627240|gb|AJJZ010615039.1|	95	20	1	20	293	274	20	mHbCIRBAC83E19_R	gi|447627240|gb|AJJZ010615039.1|	100	15	1	15	117	131	15	177
mHbCIRM124	mHbCIRM124_F	gi|448057918|gb|AJJZ010221731.1|	100	25	1	25	9683	9659	25	mHbCIRM124_R	gi|448057918|gb|AJJZ010221731.1|	100	25	1	25	9536	9560	25	148
mHbCIRM412	mHbCIRM412_F	gi|447692852|gb|AJJZ010578034.1|	100	25	1	25	3526	3502	25	mHbCIRM412_R	gi|447692852|gb|AJJZ010578034.1|	100	25	1	25	3269	3293	25	258
mHbCIRM630	mHbCIRM630_F	gi|445438851|gb|AJJZ010937763.1|	100	25	1	25	8417	8441	25	mHbCIRM630_R	gi|445438851|gb|AJJZ010937763.1|	100	25	1	25	8682	8658	25	266
mHbCIRt730	mHbCIRt730_F	gi|445313872|gb|AJJZ011032070.1|	100	24	1	24	216	239	24	mHbCIRt730_R	gi|445313872|gb|AJJZ011032070.1|	100	22	1	22	398	377	22	183
mHbCIRt730	mHbCIRt730_F	gi|448791587|gb|AJJZ010023174.1|	100	24	1	24	125	148	24	mHbCIRt730_R	gi|448791587|gb|AJJZ010023174.1|	100	22	1	22	293	272	22	169
T1067	T1067_F	gi|445287013|gb|AJJZ011057705.1|	100	21	1	21	2760	2740	21	T1067_R	gi|445287013|gb|AJJZ011057705.1|	100	21	1	21	2499	2519	21	262
t140	t140_F	gi|445391108|gb|AJJZ010971904.1|	100	24	1	24	410	387	24	t140_R	gi|445391108|gb|AJJZ010971904.1|	100	23	1	23	164	186	23	247
t182	t182_F	gi|447739617|gb|AJJZ010532567.1|	95.83	24	1	24	897	920	24	t182_R	gi|447739617|gb|AJJZ010532567.1|	100	24	1	24	1033	1010	24	137
T2086	T2086_F	gi|448034470|gb|AJJZ010245177.1|	100	20	1	20	5388	5407	20	T2086_R	gi|448034470|gb|AJJZ010245177.1|	100	18	1	18	5572	5555	18	185
T2091	T2091_F	gi|448026633|gb|AJJZ010253014.1|	100	16	1	16	56	71	16	T2091_R	gi|448026633|gb|AJJZ010253014.1|	100	17	1	17	341	325	17	286
T2093	T2093_F	gi|445393679|gb|AJJZ010969784.1|	100	17	1	17	1194	1210	17	T2093_R	gi|445393679|gb|AJJZ010969784.1|	100	18	1	18	1430	1413	18	237
T2096	T2096_F	gi|447655606|gb|AJJZ010591371.1|	100	16	1	16	1566	1581	16	T2096_R	gi|447655606|gb|AJJZ010591371.1|	100	20	1	20	1772	1753	20	207
T2103	T2103_F	gi|448038784|gb|AJJZ010240863.1|	100	18	1	18	3332	3315	18	T2103_R	gi|448038784|gb|AJJZ010240863.1|	100	17	1	17	3221	3237	17	112
T2106	T2106_F	gi|447969477|gb|AJJZ010310169.1|	100	17	1	17	666	650	17	T2106_R	gi|447969477|gb|AJJZ010310169.1|	94.44	18	1	18	343	360	18	324
T2113	T2113_F	gi|448058968|gb|AJJZ010220681.1|	100	17	1	17	3946	3962	17	T2113_R	gi|448058968|gb|AJJZ010220681.1|	100	18	1	18	4090	4073	18	145
T2127	T2127_F	gi|448014586|gb|AJJZ010265060.1|	100	17	1	17	6921	6937	17	T2127_R	gi|448014586|gb|AJJZ010265060.1|	100	18	1	18	7078	7061	18	158
T2140	T2140_F	gi|445412347|gb|AJJZ010955701.1|	100	15	1	15	962	976	15	T2140_R	gi|445412347|gb|AJJZ010955701.1|	100	17	1	17	1060	1044	17	99
T2447	T2447_F	gi|448037542|gb|AJJZ010242105.1|	100	20	1	20	481	500	20	T2447_R	gi|448037542|gb|AJJZ010242105.1|	100	17	1	17	728	712	17	248
T2449	T2449_F	gi|445371716|gb|AJJZ010988750.1|	100	16	1	16	4011	3996	16	T2449_R	gi|445371716|gb|AJJZ010988750.1|	100	16	1	16	3912	3927	16	100
T2449	T2449_F	gi|448082788|gb|AJJZ010198797.1|	100	16	1	16	584	599	16	T2449_R	gi|448082788|gb|AJJZ010198797.1|	100	16	1	16	681	666	16	98
T2542	T2542_F	gi|447857021|gb|AJJZ010415187.1|	100	18	1	18	3212	3229	18	T2542_R	gi|447857021|gb|AJJZ010415187.1|	100	16	1	16	3542	3527	16	331
T2587	T2587_F	gi|445448832|gb|AJJZ010930429.1|	100	17	1	17	1951	1967	17	T2587_R	gi|445448832|gb|AJJZ010930429.1|	100	18	1	18	2271	2254	18	321
T2588	T2588_F	gi|447464353|gb|AJJZ010777017.1|	100	17	1	17	542	526	17	T2588_R	gi|447464353|gb|AJJZ010777017.1|	100	18	1	18	378	395	18	165
T2588	T2588_F	gi|447874890|gb|AJJZ010397318.1|	100	17	1	17	391	375	17	T2588_R	gi|447874890|gb|AJJZ010397318.1|	100	18	1	18	235	252	18	157
T2607	T2607_F	gi|447998363|gb|AJJZ010281283.1|	100	18	1	18	1159	1142	18	T2607_R	gi|447998363|gb|AJJZ010281283.1|	100	16	2	17	1085	1100	17	75
T2611	T2611_F	gi|447841381|gb|AJJZ010430827.1|	100	19	1	19	706	724	19	T2611_R	gi|447841381|gb|AJJZ010430827.1|	100	17	1	17	986	970	17	281
T2611	T2611_F	gi|445411209|gb|AJJZ010956777.1|	94.74	19	1	19	781	799	19	T2611_R	gi|445411209|gb|AJJZ010956777.1|	100	17	1	17	1221	1205	17	441
T2619	T2619_F	gi|447462931|gb|AJJZ010778439.1|	100	17	1	17	978	994	17	T2619_R	gi|447462931|gb|AJJZ010778439.1|	100	17	1	17	1266	1250	17	289
T2620	T2620_F	gi|448039760|gb|AJJZ010239887.1|	100	17	1	17	6481	6465	17	T2620_R	gi|448039760|gb|AJJZ010239887.1|	100	19	1	19	6237	6255	19	245
T2625	T2625_F	gi|445339691|gb|AJJZ011010949.1|	100	20	1	20	2890	2909	20	T2625_R	gi|445339691|gb|AJJZ011010949.1|	100	16	1	16	2972	2957	16	83
T2628	T2628_F	gi|447987318|gb|AJJZ010292328.1|	100	17	1	17	1262	1278	17	T2628_R	gi|447987318|gb|AJJZ010292328.1|	100	15	1	15	1382	1368	15	121
T2635	T2635_F	gi|447564531|gb|AJJZ010676839.1|	100	19	1	19	2427	2409	19	T2635_R	gi|447564531|gb|AJJZ010676839.1|	100	19	1	19	2076	2094	19	352
T2636	T2636_F	gi|448057670|gb|AJJZ010221979.1|	100	17	1	17	11894	11878	17	T2636_R	gi|448057670|gb|AJJZ010221979.1|	100	17	1	17	11765	11781	17	130
T2645	T2645_F	gi|447980716|gb|AJJZ010298930.1|	94.74	19	1	19	75	93	19	T2645_R	gi|447980716|gb|AJJZ010298930.1|	100	19	1	19	239	221	19	165
T2647	T2647_F	gi|445445606|gb|AJJZ010932747.1|	100	19	1	19	921	939	19	T2647_R	gi|445445606|gb|AJJZ010932747.1|	100	19	1	19	1141	1123	19	221
T2648	T2648_F	gi|448011690|gb|AJJZ010267956.1|	100	16	1	16	798	783	16	T2648_R	gi|448011690|gb|AJJZ010267956.1|	100	17	1	17	518	534	17	281
T2650	T2650_F	gi|447819770|gb|AJJZ010452414.1|	100	20	1	20	1277	1296	20	T2650_R	gi|447819770|gb|AJJZ010452414.1|	100	19	1	19	1492	1474	19	216
T2659	T2659_F	gi|448011693|gb|AJJZ010267953.1|	100	17	1	17	2236	2220	17	T2659_R	gi|448011693|gb|AJJZ010267953.1|	100	16	1	16	2028	2043	16	209
T2668	T2668_F	gi|445444927|gb|AJJZ010933296.1|	100	20	1	20	1294	1313	20	T2668_R	gi|445444927|gb|AJJZ010933296.1|	100	17	1	17	1616	1600	17	323
t283	t283_F	gi|447739615|gb|AJJZ010532569.1|	95.83	24	1	24	2935	2958	24	t283_R	gi|447739615|gb|AJJZ010532569.1|	100	24	1	24	3149	3126	24	215
T373	T373_F	gi|445445577|gb|AJJZ010932776.1|	100	20	1	20	3738	3757	20	T373_R	gi|445445577|gb|AJJZ010932776.1|	95	20	1	20	3922	3903	20	185
t45	t45_F	gi|447998503|gb|AJJZ010281143.1|	100	23	1	23	6050	6072	23	t45_R	gi|447998503|gb|AJJZ010281143.1|	100	23	1	23	6267	6245	23	218
t686	t686_F	gi|447494108|gb|AJJZ010747262.1|	100	19	1	19	2852	2870	19	t686_R	gi|447494108|gb|AJJZ010747262.1|	100	21	1	21	3030	3010	21	179
t73	t73_F	gi|445423119|gb|AJJZ010948413.1|	95.45	22	2	23	3886	3907	23	t73_R	gi|445423119|gb|AJJZ010948413.1|	100	23	1	23	4013	3991	23	128
TA2158	TA2158_F	gi|447955222|gb|AJJZ010324424.1|	100	18	1	18	3956	3973	18	TA2158_R	gi|447955222|gb|AJJZ010324424.1|	100	17	1	17	4260	4244	17	305
TA2161	TA2161_F	gi|448011072|gb|AJJZ010268574.1|	100	18	1	18	1832	1815	18	TA2161_R	gi|448011072|gb|AJJZ010268574.1|	100	17	1	17	1709	1725	17	124
TA2163	TA2163_F	gi|448053644|gb|AJJZ010226005.1|	100	18	1	18	7904	7887	18	TA2163_R	gi|448053644|gb|AJJZ010226005.1|	100	17	1	17	7719	7735	17	186
TA2197	TA2197_F	gi|447964031|gb|AJJZ010315615.1|	100	17	1	17	840	824	17	TA2197_R	gi|447964031|gb|AJJZ010315615.1|	100	17	1	17	697	713	17	144
TA2203	TA2203_F	gi|447681548|gb|AJJZ010582385.1|	100	23	1	23	5259	5281	23	TA2203_R	gi|447681548|gb|AJJZ010582385.1|	100	18	1	18	5474	5457	18	216
TA2203	TA2203_F	gi|448006590|gb|AJJZ010273056.1|	91.3	23	1	23	5438	5460	23	TA2203_R	gi|448006590|gb|AJJZ010273056.1|	94.44	18	1	18	5620	5603	18	183
TA2205	TA2205_F	gi|447700621|gb|AJJZ010571563.1|	100	16	1	16	21078	21063	16	TA2205_R	gi|447700621|gb|AJJZ010571563.1|	100	18	1	18	20981	20998	18	98
TA2284	TA2284_F	gi|448025391|gb|AJJZ010254256.1|	100	20	1	20	28116	28097	20	TA2284_R	gi|448025391|gb|AJJZ010254256.1|	100	20	1	20	27836	27855	20	281
TA2288	TA2288_F	gi|448084607|gb|AJJZ010197829.1|	100	20	1	20	5144	5125	20	TA2288_R	gi|448084607|gb|AJJZ010197829.1|	100	17	1	17	5053	5069	17	92
TA2545	TA2545_F	gi|447995570|gb|AJJZ010284076.1|	100	18	1	18	10919	10902	18	TA2545_R	gi|447995570|gb|AJJZ010284076.1|	100	17	1	17	10592	10608	17	328
TA2550	TA2550_F	gi|448074961|gb|AJJZ010204688.1|	100	19	1	19	2411	2429	19	TA2550_R	gi|448074961|gb|AJJZ010204688.1|	100	16	1	16	2614	2599	16	204
TAs2173	TAs2173_F	gi|447789520|gb|AJJZ010482664.1|	100	17	1	17	3926	3910	17	TAs2173_R	gi|447789520|gb|AJJZ010482664.1|	100	20	1	20	3751	3770	20	176
TAs2178	TAs2178_F	gi|445437284|gb|AJJZ010938772.1|	100	19	1	19	2854	2872	19	TAs2178_R	gi|445437284|gb|AJJZ010938772.1|	100	17	1	17	3088	3072	17	235
TAs2186	TAs2186_F	gi|447755271|gb|AJJZ010516913.1|	100	15	1	15	2820	2806	15	TAs2186_R	gi|447755271|gb|AJJZ010516913.1|	100	15	1	15	2626	2640	15	195
TAs2191	TAs2191_F	gi|445421726|gb|AJJZ010949355.1|	100	18	1	18	1896	1913	18	TAs2191_R	gi|445421726|gb|AJJZ010949355.1|	100	18	1	18	2031	2014	18	136
TAs2192	TAs2192_F	gi|448758609|gb|AJJZ010056150.1|	100	20	1	20	1602	1583	20	TAs2192_R	gi|448758609|gb|AJJZ010056150.1|	100	16	1	16	1423	1438	16	180
TAs2207	TAs2207_F	gi|447946550|gb|AJJZ010333096.1|	100	17	1	17	969	985	17	TAs2207_R	gi|447946550|gb|AJJZ010333096.1|	100	20	1	20	1171	1152	20	203
TAs2207	TAs2207_F	gi|447869839|gb|AJJZ010402369.1|	100	16	1	16	515	530	17	TAs2207_R	gi|447869839|gb|AJJZ010402369.1|	100	20	1	20	734	715	20	220
TAs2212	TAs2212_F	gi|447654945|gb|AJJZ010591598.1|	100	18	1	18	1171	1154	18	TAs2212_R	gi|447654945|gb|AJJZ010591598.1|	100	19	1	19	900	918	19	272
TAs2212	TAs2212_F	gi|447654945|gb|AJJZ010591598.1|	100	18	1	18	1171	1154	18	TAs2212_R	gi|447654945|gb|AJJZ010591598.1|	100	15	5	19	939	953	19	233
TAs2216	TAs2216_F	gi|445256474|gb|AJJZ011086401.1|	100	19	1	19	4806	4824	19	TAs2216_R	gi|445256474|gb|AJJZ011086401.1|	100	19	1	19	4967	4949	19	162
TAs2224	TAs2224_F	gi|448128941|gb|AJJZ010173074.1|	100	18	1	18	5538	5555	18	TAs2224_R	gi|448128941|gb|AJJZ010173074.1|	94.44	18	1	18	5725	5708	18	188
TAs2227	TAs2227_F	gi|445337174|gb|AJJZ011012953.1|	100	18	1	18	972	989	18	TAs2227_R	gi|445337174|gb|AJJZ011012953.1|	100	17	1	17	1168	1152	17	197
TAs2230	TAs2230_F	gi|447926512|gb|AJJZ010353134.1|	100	20	1	20	424	443	20	TAs2230_R	gi|447926512|gb|AJJZ010353134.1|	100	17	1	17	612	596	17	189
TAs2254	TAs2254_F	gi|447466263|gb|AJJZ010775107.1|	100	18	1	18	611	594	18	TAs2254_R	gi|447466263|gb|AJJZ010775107.1|	100	18	1	18	429	446	18	183
TAs2254	TAs2254_F	gi|447499467|gb|AJJZ010741903.1|	100	18	1	18	552	535	18	TAs2254_R	gi|447499467|gb|AJJZ010741903.1|	100	18	1	18	373	390	18	180
TAs2258	TAs2258_F	gi|445369947|gb|AJJZ010990331.1|	100	20	1	20	2303	2284	20	TAs2258_R	gi|445369947|gb|AJJZ010990331.1|	100	15	1	15	2046	2060	15	258
TAs2262	TAs2262_F	gi|448025396|gb|AJJZ010254251.1|	100	16	1	16	943	958	16	TAs2262_R	gi|448025396|gb|AJJZ010254251.1|	100	20	1	20	1164	1145	20	222
TAs2265	TAs2265_F	gi|445404646|gb|AJJZ010961221.1|	100	20	1	20	2623	2642	20	TAs2265_R	gi|445404646|gb|AJJZ010961221.1|	100	16	1	16	2872	2857	16	250
TAs2270	TAs2270_F	gi|447775855|gb|AJJZ010496329.1|	100	16	3	18	8536	8521	18	TAs2270_R	gi|447775855|gb|AJJZ010496329.1|	94.44	18	1	18	8470	8487	18	67
TAs2270	TAs2270_F	gi|448055124|gb|AJJZ010224525.1|	100	15	4	18	1295	1281	18	TAs2270_R	gi|448055124|gb|AJJZ010224525.1|	100	18	1	18	1198	1215	18	98
TAs2271	TAs2271_F	gi|447625136|gb|AJJZ010617143.1|	100	20	1	20	167	186	20	TAs2271_R	gi|447625136|gb|AJJZ010617143.1|	100	19	1	19	376	358	19	210
TAs2271	TAs2271_F	gi|445435583|gb|AJJZ010939850.1|	95	20	1	20	2447	2466	20	TAs2271_R	gi|445435583|gb|AJJZ010939850.1|	94.74	19	1	19	2626	2608	19	180
TAs2277	TAs2277_F	gi|447705644|gb|AJJZ010566540.1|	100	20	2	21	9057	9038	21	TAs2277_R	gi|447705644|gb|AJJZ010566540.1|	100	19	1	19	8919	8937	19	139
TAs2283	TAs2283_F	gi|445310819|gb|AJJZ011034981.1|	100	17	1	17	7092	7076	17	TAs2283_R	gi|445310819|gb|AJJZ011034981.1|	100	19	1	19	7011	7029	19	82
TAs2457	TAs2457_F	gi|447472886|gb|AJJZ010768484.1|	100	17	1	17	2980	2996	17	TAs2457_R	gi|447472886|gb|AJJZ010768484.1|	100	18	1	18	3255	3238	18	276
TAs2464	TAs2464_F	gi|447949991|gb|AJJZ010329655.1|	100	18	1	18	894	911	18	TAs2464_R	gi|447949991|gb|AJJZ010329655.1|	100	21	1	21	1106	1086	21	213
TAs2547	TAs2547_F	gi|447939061|gb|AJJZ010340585.1|	95	20	1	20	170	189	20	TAs2547_R	gi|447939061|gb|AJJZ010340585.1|	100	17	1	17	328	312	17	159
TAs2548	TAs2548_F	gi|447980229|gb|AJJZ010299417.1|	100	16	1	16	1427	1412	16	TAs2548_R	gi|447980229|gb|AJJZ010299417.1|	100	16	1	16	1132	1147	16	296
TAs2557	TAs2557_F	gi|448052626|gb|AJJZ010227023.1|	100	17	1	17	922	938	17	TAs2557_R	gi|448052626|gb|AJJZ010227023.1|	100	17	1	17	1120	1104	17	199
TAs2559	TAs2559_F	gi|448057659|gb|AJJZ010221990.1|	94.44	18	1	18	2017	2034	18	TAs2559_R	gi|448057659|gb|AJJZ010221990.1|	100	18	1	18	2276	2259	18	260
TAs2688	TAs2688_F	gi|448050536|gb|AJJZ010229113.1|	100	16	1	16	8945	8960	16	TAs2688_R	gi|448050536|gb|AJJZ010229113.1|	100	17	1	17	9257	9241	17	313
TAs2698	TAs2698_F	gi|447577006|gb|AJJZ010664933.1|	100	18	1	18	535	518	18	TAs2698_R	gi|447577006|gb|AJJZ010664933.1|	100	19	1	19	194	212	19	342
TAs2706	TAs2706_F	gi|448006776|gb|AJJZ010272870.1|	100	20	1	20	252	233	20	TAs2706_R	gi|448006776|gb|AJJZ010272870.1|	100	20	1	20	62	81	20	191
TAs2709	TAs2709_F	gi|448044062|gb|AJJZ010235585.1|	100	18	1	18	691	708	18	TAs2709_R	gi|448044062|gb|AJJZ010235585.1|	100	19	1	19	1012	994	19	322
TAs2709	TAs2709_F	gi|448044029|gb|AJJZ010235618.1|	100	15	4	18	1216	1202	18	TAs2709_R	gi|448044029|gb|AJJZ010235618.1|	100	19	1	19	886	904	19	331
TAs2724	TAs2724_F	gi|448138008|gb|AJJZ010164007.1|	100	15	1	15	3525	3511	15	TAs2724_R	gi|448138008|gb|AJJZ010164007.1|	100	15	1	15	3386	3400	15	140
TAs2730	TAs2730_F	gi|447937743|gb|AJJZ010341903.1|	100	20	1	20	673	692	20	TAs2730_R	gi|447937743|gb|AJJZ010341903.1|	100	16	1	16	742	727	16	70
TAs2743	TAs2743_F	gi|448059709|gb|AJJZ010219940.1|	100	16	1	16	1229	1214	16	TAs2743_R	gi|448059709|gb|AJJZ010219940.1|	100	15	1	15	1107	1121	15	123
TAs2744	TAs2744_F	gi|445341331|gb|AJJZ011009615.1|	100	16	1	16	947	962	16	TAs2744_R	gi|445341331|gb|AJJZ011009615.1|	100	16	1	16	1094	1079	16	148
TAs2746	TAs2746_F	gi|445420534|gb|AJJZ010949991.1|	100	18	1	18	8896	8879	18	TAs2746_R	gi|445420534|gb|AJJZ010949991.1|	100	20	1	20	8734	8753	20	163
TAs2748	TAs2748_F	gi|447743242|gb|AJJZ010528942.1|	100	16	1	16	8283	8268	16	TAs2748_R	gi|447743242|gb|AJJZ010528942.1|	100	18	1	18	8088	8105	18	196
a105	a105_F	gi|447902526|gb|AJJZ010369682.1|	100	24	1	24	150	127	24	a105_R	gi|448074962|gb|AJJZ010204687.1|	100	23	1	23	3094	3116	23	NA
a129	a129_F	gi|447820938|gb|AJJZ010451246.1|	100	22	1	22	137	116	22	a129_R	gi|447925394|gb|AJJZ010354252.1|	100	20	1	20	887	906	20	NA
a131	a131_F	gi|448035463|gb|AJJZ010244184.1|	100	23	1	23	4787	4809	23	a131_R	gi|447988098|gb|AJJZ010291548.1|	100	24	1	24	2966	2989	24	NA
a156	a156_F	gi|448076027|gb|AJJZ010203622.1|	100	22	1	22	103	82	22	a156_R	gi|447796783|gb|AJJZ010475401.1|	100	23	1	23	547	569	23	NA
a179	a179_F	gi|447858049|gb|AJJZ010414159.1|	100	24	1	24	117	94	24	a179_R	gi|448023885|gb|AJJZ010255761.1|	100	24	1	24	7604	7627	24	NA
a183	a183_F	gi|447993112|gb|AJJZ010286534.1|	100	21	1	21	978	998	21	a183_R	gi|447980680|gb|AJJZ010298966.1|	100	21	1	21	124	104	21	NA
a214	a214_F	gi|447442301|gb|AJJZ010799069.1|	100	23	1	23	85	63	23	a214_R	gi|447442302|gb|AJJZ010799068.1|	100	24	1	24	2444	2467	24	NA
a218	a218_F	gi|448040814|gb|AJJZ010238833.1|	100	24	1	24	103	80	24	a218_R	gi|448016680|gb|AJJZ010262966.1|	100	18	1	18	108	91	18	NA
a235	a235_F	gi|445446224|gb|AJJZ010932230.1|	100	24	1	24	6164	6187	24	a235_R	gi|445446223|gb|AJJZ010932231.1|	100	20	1	20	79	60	20	NA
A2398	A2398_F	gi|448034656|gb|AJJZ010244991.1|	100	18	1	18	6430	6447	18	A2398_R	gi|447944112|gb|AJJZ010335534.1|	100	18	1	18	147	130	18	NA
A2410	A2410_F	gi|447946532|gb|AJJZ010333114.1|	100	22	1	22	5781	5802	22	A2410_R	gi|447946531|gb|AJJZ010333115.1|	100	22	1	22	130	109	22	NA
A2415	A2415_F	gi|447904303|gb|AJJZ010367905.1|	100	16	1	16	1068	1083	16	A2415_R	gi|447904302|gb|AJJZ010367906.1|	100	18	1	18	88	71	18	NA
A2429	A2429_F	gi|447770601|gb|AJJZ010501583.1|	100	17	1	17	187	171	17	A2429_R	gi|448013533|gb|AJJZ010266113.1|	100	20	1	20	7018	7037	20	NA
A2433	A2433_F	gi|445407520|gb|AJJZ010959657.1|	100	15	1	15	5494	5508	15	A2433_R	gi|447943311|gb|AJJZ010336335.1|	100	19	1	19	57	39	19	NA
A2442	A2442_F	gi|447864098|gb|AJJZ010408110.1|	100	19	1	19	98	116	19	A2442_R	gi|448078313|gb|AJJZ010201336.1|	100	18	1	18	126	109	18	NA
A2482	A2482_F	gi|447980396|gb|AJJZ010299250.1|	100	19	1	19	38	20	19	A2482_R	gi|445386747|gb|AJJZ010975521.1|	100	19	1	19	3918	3936	19	NA
A2485	A2485_F	gi|448210372|gb|AJJZ010091643.1|	100	15	1	15	973	987	15	A2485_R	gi|448135384|gb|AJJZ010166631.1|	100	20	1	20	2575	2594	20	NA
A2503	A2503_F	gi|447876704|gb|AJJZ010395504.1|	100	20	1	20	53	34	20	A2503_R	gi|447876650|gb|AJJZ010395558.1|	100	18	1	18	228	211	18	NA
A2505	A2505_F	gi|447449136|gb|AJJZ010792234.1|	100	14	3	16	550	537	16	A2505_R	gi|447887502|gb|AJJZ010384706.1|	100	15	3	17	2214	2228	18	NA
A2528	A2528_F	gi|447863309|gb|AJJZ010408899.1|	100	17	2	18	390	374	18	A2528_R	gi|447517132|gb|AJJZ010724238.1|	100	14	4	17	464	477	17	NA
A2530	A2530_F	gi|447922835|gb|AJJZ010356811.1|	100	19	1	19	9758	9776	19	A2530_R	gi|447922834|gb|AJJZ010356812.1|	100	20	1	20	237	218	20	NA
a265	a265_F	gi|448182786|gb|AJJZ010119229.1|	100	23	1	23	1814	1836	23	a265_R	gi|447941596|gb|AJJZ010338050.1|	100	22	1	22	165	144	22	NA
A2684	A2684_F	gi|448797504|gb|AJJZ010017257.1|	100	17	1	17	4017	4033	17	A2684_R	gi|448797503|gb|AJJZ010017258.1|	100	20	1	20	120	101	20	NA
A2723	A2723_F	gi|445399040|gb|AJJZ010965362.1|	100	18	1	18	82	65	18	A2723_R	gi|447504646|gb|AJJZ010736724.1|	100	18	1	18	148	165	18	NA
a274	a274_F	gi|447459937|gb|AJJZ010781433.1|	100	24	1	24	3830	3853	24	a274_R	gi|447459936|gb|AJJZ010781434.1|	100	22	1	22	91	70	22	NA
A2747	A2747_F	gi|448006522|gb|AJJZ010273124.1|	100	16	1	16	38	23	16	A2747_R	gi|447888581|gb|AJJZ010383627.1|	100	19	1	19	207	189	19	NA
a283	a283_F	gi|447958967|gb|AJJZ010320679.1|	100	22	1	22	2473	2494	22	a283_R	gi|447879337|gb|AJJZ010392871.1|	100	20	1	20	1282	1301	20	NA
a288	a288_F	gi|445463459|gb|AJJZ010921153.1|	100	23	1	23	73	51	23	a288_R	gi|448137223|gb|AJJZ010164792.1|	100	23	1	23	152	130	23	NA
a289	a289_F	gi|447972744|gb|AJJZ010306902.1|	100	22	1	22	5542	5563	22	a289_R	gi|447972743|gb|AJJZ010306903.1|	100	21	1	21	118	98	21	NA
a297	a297_F	gi|448032668|gb|AJJZ010246979.1|	100	21	1	21	1452	1472	21	a297_R	gi|448052289|gb|AJJZ010227360.1|	100	23	1	23	72	50	23	NA
A31	A31_F	gi|447900401|gb|AJJZ010371807.1|	100	18	1	18	752	769	18	A31_R	gi|445103516|gb|AJJZ011189992.1|	100	25	1	25	6316	6340	25	NA
A320	A320_F	gi|448048237|gb|AJJZ010231412.1|	100	23	1	23	4770	4792	23	A320_R	gi|447952356|gb|AJJZ010327290.1|	100	21	1	21	1844	1864	21	NA
a330	a330_F	gi|445417363|gb|AJJZ010952162.1|	100	25	1	25	116	92	25	a330_R	gi|445417364|gb|AJJZ010952161.1|	100	23	1	23	1217	1239	23	NA
a337	a337_F	gi|447403219|gb|AJJZ010838151.1|	100	23	1	23	470	492	23	a337_R	gi|448138271|gb|AJJZ010163744.1|	100	22	1	22	57	36	22	NA
a365	a365_F	gi|448169745|gb|AJJZ010132270.1|	100	22	1	22	164	143	22	a365_R	gi|448138860|gb|AJJZ010163155.1|	100	24	1	24	45	22	24	NA
a385	a385_F	gi|445395483|gb|AJJZ010968292.1|	100	20	1	20	8949	8968	20	a385_R	gi|445395482|gb|AJJZ010968293.1|	100	23	1	23	97	75	23	NA
a394	a394_F	gi|447871947|gb|AJJZ010400261.1|	100	22	1	22	1281	1302	22	a394_R	gi|447963079|gb|AJJZ010316567.1|	100	22	1	22	1067	1088	22	NA
a403	a403_F	gi|445534237|gb|AJJZ010868131.1|	100	20	1	20	121	102	20	a403_R	gi|445534238|gb|AJJZ010868130.1|	100	21	1	21	2989	3009	21	NA
a438	a438_F	gi|448144567|gb|AJJZ010157448.1|	100	22	1	22	41	20	22	a438_R	gi|447953298|gb|AJJZ010326348.1|	100	21	1	21	175	155	21	NA
a460	a460_F	gi|448012871|gb|AJJZ010266775.1|	100	19	1	19	43	25	19	a460_R	gi|448014459|gb|AJJZ010265187.1|	100	22	1	22	126	147	22	NA
a95	a95_F	gi|447877315|gb|AJJZ010394893.1|	100	23	1	23	502	524	23	a95_R	gi|447819002|gb|AJJZ010453182.1|	100	21	1	21	2948	2968	21	NA
mHbCIRA2409	mHbCIRA2409_F	gi|445445658|gb|AJJZ010932699.1|	100	15	2	16	2431	2445	16	mHbCIRA2409_R	gi|447996476|gb|AJJZ010283170.1|	100	19	1	19	134	116	19	NA
mHbCIRA2414	mHbCIRA2414_F	gi|448766317|gb|AJJZ010048442.1|	100	15	3	17	232	246	17	mHbCIRA2414_R	gi|447569152|gb|AJJZ010672218.1|	100	18	1	18	6595	6612	18	NA
mHbCIRhmg1	mHbCIRhmg1_F	gi|447900078|gb|AJJZ010372130.1|	100	25	1	25	84	60	25	mHbCIRhmg1_R	gi|447900080|gb|AJJZ010372128.1|	100	25	1	25	2484	2508	25	NA
mHbCIRM574	mHbCIRM574_F	gi|448166992|gb|AJJZ010135023.1|	100	25	1	25	840	864	25	mHbCIRM574_R	gi|445416732|gb|AJJZ010952723.1|	100	25	1	25	8351	8375	25	NA
mHbCIRMT67	mHbCIRMT67_F	gi|445541938|gb|AJJZ010860430.1|	100	20	1	20	88	69	20	mHbCIRMT67_R	gi|445541939|gb|AJJZ010860429.1|	100	20	1	20	6688	6707	20	NA
mHbCIRMT9	mHbCIRMT9_F	gi|448050191|gb|AJJZ010229458.1|	100	20	1	20	250	231	20	mHbCIRMT9_R	gi|445375249|gb|AJJZ010985724.1|	100	22	1	22	195	174	22	NA
T2617	T2617_F	gi|447646822|gb|AJJZ010595457.1|	100	17	1	17	1282	1298	17	T2617_R	gi|447467692|gb|AJJZ010773678.1|	100	16	1	16	126	111	16	NA
t93	t93_F	gi|447880522|gb|AJJZ010391686.1|	100	23	1	23	1952	1974	23	t93_R	gi|447705634|gb|AJJZ010566550.1|	100	24	1	24	5602	5625	24	NA
t97	t97_F	gi|447959315|gb|AJJZ010320331.1|	100	22	1	22	3065	3086	22	t97_R	gi|447869997|gb|AJJZ010402211.1|	100	25	1	25	66	42	25	NA
TA2252	TA2252_F	gi|447955043|gb|AJJZ010324603.1|	100	18	1	18	4276	4293	18	TA2252_R	gi|448006550|gb|AJJZ010273096.1|	100	19	1	19	4639	4657	19	NA
TAs2170	TAs2170_F	gi|445393736|gb|AJJZ010969727.1|	100	18	1	18	2208	2191	18	TAs2170_R	gi|447495294|gb|AJJZ010746076.1|	100	14	2	15	927	940	15	NA
TAs2222	TAs2222_F	gi|448210803|gb|AJJZ010091212.1|	100	20	1	20	158	139	20	TAs2222_R	gi|448210804|gb|AJJZ010091211.1|	100	20	1	20	7848	7867	20	NA
TAs2465	TAs2465_F	gi|448786358|gb|AJJZ010028403.1|	100	19	1	19	112	94	19	TAs2465_R	gi|445283024|gb|AJJZ011061529.1|	100	15	1	15	4764	4778	15	NA
TAs2558	TAs2558_F	gi|447968608|gb|AJJZ010311038.1|	100	19	1	19	120	102	19	TAs2558_R	gi|445364949|gb|AJJZ010994513.1|	100	16	1	16	2872	2887	16	NA
